# Supplementary material for: Kinetic and synthetic influences of water and solvent-free conditions on 1,3-dipolar cycloaddition reactions: the phthalazinium and pyridazinium dicyanomethanide 1,3-dipoles: surprisingly successful synthetic methodsElectronic supplementary information (ESI) available: sample kinetic graphs and optimised transition state structures. See http://www.rsc.org/suppdata/p2/b2/b206028k/
Source: Royal Society of Chemistry journal article supplement (doi:10.1039/b206028k), 2002-10-14
Supplement: b206028k.doc [file b206028k.doc]

# Supporting Information, Kinetic Data

# Table 1, entry 5.

**Figure 1:** Typical pseudo-first order graph for the reaction of phthalazinium-2-dicyanomethanide **1** and 2-cyclopenten-1-one in 0.9 mole fraction water:acetonitrile at 37oC. ( = 420nm). Initial concentration of 2-cyclopenten-1-one = 0.32 mol dm-3, Cycle time 60s. k1 = 5.06x10-3s-1 (A= 0.034), r = 0.9998

**Figure 2:** Second order rate constant plot for the reaction of 1,3-dipole **1** with 2-cyclopenten-1-one in 0.9 mole fraction water:acetonitrile at 37oC. ( = 420nm). k2 = 0.01546 dm3 mol-1s-1, r = 0.999.

**Table 1, entry 7.**

**Figure 3:** Typical pseudo-first order graph for the reaction of phthalazinium-2-dicyanomethanide **1** and methyl acrylate 0.9 mole fraction water:acetonitrile at 37oC. ( = 420nm). Initial concentration of methyl acrylate = 0.048mol dm-3,

Cycle time 60s. k1 = 8.57x10-3 s-1(A= 0.032), r = 0.9999.

**Figure 4:** Second order rate constant plot for the reaction of 1,3-dipole **1** with methyl acrylate in 0.9 mole fraction water:acetonitrile at 37oC. ( = 420nm). k2 = 0.1879 dm3 mol-1s-1, r = 0.998.

**Table 1, entry 12.**

**Figure 5:** Typical pseudo-first order graph for the reaction of phthalazinium-2-dicyanomethanide **1** and phenyl vinyl sulfone in acetonitrile at 37oC. ( = 420nm). Initial concentration of phenyl vinyl sulfone = 0.08mol dm-3, Cycle time 60s. k1 = 1.01x10-3 s-1 (A= 0.099), r = 0.9995.

**Figure 6:** Second order rate constant plot for the reaction of 1,3-dipole **1** with phenyl vinyl sulfone in acetonitrile at 37oC. ( = 420nm). k2 = 0.01251dm3 mol-1s-1, r = 0.994.

**Table 1, entry 27.**

**Figure 7:** Typical pseudo-first order graph for the reaction of pyridazinium dicyanomethanide **2** and ethyl vinyl ketone in water at 37oC. ( = 420nm). Initial concentration of methyl vinyl ketone = 0.024mol dm-3, Cycle time 180s.

k1 = 2.87x10-3s-1(A= 0.039), r = 0.9998.

**Figure 8:** Second order rate constant plot for the reaction of 1,3-dipole **1** with ethyl vinyl ketone in water at 37oC. ( = 420nm). k2 = 0.0825 dm3 mol-1s-1, r = 0.995.

**Table 1, entry 29.**

**Figure 9:** Typical pseudo-first order graph for the reaction of pyridazinium dicyanomethanide **2** and methyl acrylate in water at 37oC. ( = 420nm). Initial concentration of methyl vinyl ketone = 0.16mol dm-3, Cycle time 60s.k1 = 2.83x10-4 s-1(A= 0.021), r = 0.999.

#

**Figure 10:** Second order rate constant plot for the reaction of 1,3-dipole **2** with methyl acrylate in water at 37oC. ( = 420nm). k2 = 0.0017 dm3 mol-1s-1,

r = 0.998.
